# Supplementary material for: Analysis of the erythropoietin of a Tibetan Plateau schizothoracine fish (Gymnocypris dobula) reveals enhanced cytoprotection function in hypoxic environments
Source: PubMed Central journal article supplement (PMC4714423; doi:10.1186/s12862-015-0581-0), 2016-01-15
Supplement: 12862_2015_581_MOESM1_ESM.pdf [file 12862_2015_581_MOESM1_ESM.pdf]

**Figure S1. ClustalW alignment of 10 EPOR amino acid sequences**

```

G. dobula          MTKMRSNRLKIVF-MLCLAS--VTTGGQYFESKVAQLLQDETEDIKCFVVEE-KDLTCFWE 56
P. kaznakovi     MTKMRSNRLKIVF-MLCLAF--VTTGGQYFESKVAQLLQDETEDIKCFVVEE-KDLTCFWE 56
S. gongshanensis MTKMRSNRLKIVF-MLCLAF--VTTGGQHFESKVAQLLQDETEDIKCFVEG-KDLTCFWE 56
S. nukiangensis Tsao MTKMRSNRLKIVF-MLCLAF--VTTGGQHFESKVAQLLQDETEDIKCFVEG-KDLTCFWE 56
S. prenati       MTKMRSNRLKIVF-MLCLAF--VTTGGQHFESKVAQLLQDETEDITCFVEG-KDLTCFWE 56
D. rerio         MTKMRSNRLKIVF-MLCLAF--VTTGGQHFESKVAQLLQDETEDIKCFVEG-KDLTCFWE 57
C. auratus      MTKMRSNRLKIVF-MLCLAF--VTTGGQHFESKVAQLLQDETEHIKCFVEG-KDLTCFWE 56
C. carpio       MTKM-SDRLKIVF-MLCVAF--VTTGGQHFESKVAQLLQDETEDIKCFVEL-KDLTCFWE 55
C. semilaevis    MNAHRNRAAALYALLCVCV--SVLGGKTWEEKFSIMRREDPENPKCFAEDRMNLTFCWE 58
E. lucius       MTNDHLKLLVYC-MLCCTQKIIVQGAQTFQTKVALLRHVEPNPKCFAEGRDLTFCWE 59
    * . : ** . * . : : * . : : : : . ** * : : * * * *
  
```

```

G. dobula          DEEERNNSHDQYTFYSYENKNKMACAVSSLSLLASNKSVLFGILPKPPLFMTINVQVLR 116
P. kaznakovi     DEEERNNSHDQYTFYSYENKNKMACAVSSLSLLASNKSVLFSILPKPPLFTTINVQVLR 116
S. gongshanensis DEEERNNSHDQYTLTYSYENKNKMAYAVSSLSLLASNKTVLFCCLKPKPPFFTTLDVQVLH 116
S. nukiangensis Tsao DEEERNNSHDQYTLTYSYENKNKMAYAVSSLSLLASNKTVLFCCLKPKPPFFTTLDVQVLH 116
S. prenati       DEEERNNSHDQYTLTYSYENKNKMAYAVSSLSLLASNKTVLFCCLKPKPPFFTTLDVQVLH 116
D. rerio         KEDGTYNSQDNYTFYTYMENENKMDCAVSSLFLLSSNRVFFCKLPKALFFTSLDVQVLR 117
C. auratus      DEEERNNSHDQYTFYSYENKNKMACAVSSLSLLASNKTIFFCKLAKTPFFTTLDVQVHR 116
C. carpio       DEEERNNSHDQYTFYSYENKNKMACAVSSLSLLASNKTVFFCKLPKTPFFTTLDVQVFR 113
C. semilaevis    DEEETAGPVEEYFTYNYQHEDSVQCPLRSL--SSDRRXXXXXXXXXXMFVQMDIYVHR 117
E. lucius       DEEERAGSAKQYSFMYTYQENNSSECVNLTALP-AAGGRILYFCRLSQTQLFVPLDIQVFR 118
  
```

**FN3 super family domain (EPOR ligand binding domain)**

:: : \* : : \* . : : . : : : : : : \* : : : : \* : : : \* :

```

G. dobula          DGRMLYSRSLNAENFLDPPRNLTVSSGKEGQLNVSWLPPPKYIDDSLIYEVRYAVE 176
P. kaznakovi     DGRMLYSRSLNAENFLDPPRNLTVSSGKEGQMNVSWLPPPKYIDDSLIYEVRYAVE 176
S. gongshanensis DGRMLYSRRLNAENFLDPPRNLTVSSGKEGQLNVSWLPPPLKYMDDSMIYEVRYAVE 176
S. nukiangensis Tsao DGRMLYSRRLNAENFLDPPRNLTVSSGKEGQLNVSWLPPPLKYMDDSMIYEVRYAVE 176
S. prenati       DGRMLYSRRLNAENFLDPPRNLTVSSGKEGQLNVSWLPPPLKYMDDSMIYEVRYAVE 176
D. rerio         DGQMLYRSLNVENTILLDPPRNVTVSSGKEGQLNVSWLPPAVKYIDDSLIYEVRYAVE 177
C. auratus      DGQMLYRSLNAENFLDPPRNLTVSSGKEGQLNVSWLPPQLKYMDDSMIYEVRYAAE 176
C. carpio       DGRMLYSRSLNAENFLDPPRNLTVSSGKEGQLNVSWLPPPLKYMDDSMIYEVRYAVE 173
C. semilaevis    KGGLIHNRTLFDVDMVFLDPPANVTNVRTEKQDQLNVSWVAPKLYMDDSMYQIRYSSA 177
E. lucius       DGLLIHNRRHLHIELCFLLDPPVNLTVKRTEKQGLKASWMPPLKYLDSDSMIYEVSYVIA 178
  
```

**FN3 domain**

\* : : \* \* : : \* \* \* \* : \* : \* : : \* \* \* \* : \* \* \* \* : \* \* \* \* :

```

G. dobula          GSNMGKVEVIKVSTMLVLRGLQSDTRYKVVWRKPKDGVSYKGYSAWTEPVFGVTPPSDV 236
P. kaznakovi     GSNMGKVEVIKVSTMLVLRGLQSDTRYKVVWRKPKDGVSYKGYSAWTEPVFGVTPPSDV 236
S. gongshanensis GSNMGKVEVMKVSTMLVLLGLQSDTRYKVVWRKPKDGVSYKGYSAWTEPVFGVTPPSDM 236
S. nukiangensis Tsao GSNMGKVEVMKVSTRLVLLGLQSDTRYKVVWRKPKDGVSYKGYSAWTEPVFGVTPPSDM 236
S. prenati       GSNMGKVEVMKVSTMLVLLGLQSDTRYKVVWRKPKDGVSYKGYSAWTEPVFGVTPPSDV 236
D. rerio         DSHMGKVEETKASTMLVLRGLQSDTRYKVVWRKPKDGVSYKGYSSWTSPVIAVTPPGSM 237
C. auratus      GSDLGKVEVIKVSTMLVLLGLESDTRYKVVWRKPKDGVAYKGYSAWTEPVFGVTPPSDV 236
C. carpio       GSNMGKVEVIKVSTMLVLLGLQSDTRYKVVWRKPKDGVAYKGYSAWTEPVLGVTQPSDL 233
C. semilaevis    DGLETQVTESLAVTEKILTNRPGVKYEVQVRIKLDGISYDGYSAWSTGVFMETPPAEF 237
E. lucius       GTQMGQVEEVQASSEVILLGLQPGAKYSVRIKLDGVSYNGYSAWTDVPLMATLPGDL 238
  
```

**FN3 domain**

\* : : \* : \* . : \* . : \* \* \* \* : \* \* \* \* : \* \* \* \* : \* \* \* \* :

```

G. dobula          DPLIVLLALFIVLILCLLSLTGFLSQHKFLLKLLWPDIPTEHKFPGLFSVYKGFDFKEWM 296
P. kaznakovi     DPLIVLLVLFIVLILCLLSLTVFLSQHKFLLKLLWPDIPTEHKFPGLFTVYKGFDFKEWM 296
S. gongshanensis DPLIVLLVLFIVLILCLLTLTVFLSQHKFLLKLLWPDIPTEHKFPGLFTVYKGFDFKEWM 296
S. nukiangensis Tsao DPLIVLLVLFIVLILCLLTLTVFLSQHKFLLKLLWPDIPTEHKFPGLFTVYKGFDFKEWM 296
S. prenati       DPLIVLLVLFIVLILCLLTLTVFLSQHKFLLKLLWPDIPTEHKFPGLFTVYKGFDFKEWM 296
D. rerio         DPLIVLLVVFIIILILCLLSMTVILSHHKFLLKLLWPDIPTEHKFPGLFTVYKGFDFKEWM 297
C. auratus      DPLIVLLVLSIGLILCLLSLTVILSHQKFLKLLWPDIPTEHKFPGLFTVYKGFDFKEWM 296
C. carpio       DPLIMVLLVLFIVLILCLLSMTVILSHHKFLLKLLWPDIPTEHKFPGLFTVYKGFDFKEWM 293
C. semilaevis    DPLILCLTLIISFILLVFLSITILLSHRRFLTKKIWPVVPTPENKFPGLFSVYGGDFQEWL 297
E. lucius       DPLIVSLTLIISLILTLTLLSLLSHRRFLNKIWPVIPNPEKFPGLFTVYGGDFEEWL 298
    * * * * : * : * * * * : * * * * : * * * * : * * * * : * * * * :
  
```

*G. dobula* SQNNGYMWGRSVHVYTEELPSPLEVLSEVSLT----SHGTSQREERKPAEEEEKPAEE 352  
*P. kaznakovi* SQNNGNMWGRSVHVYTEELPSPLEVLSEVSLT----SHGTSQREERKPAEEEE----- 345  
*S. gongshanensis* SQNNGNMWGRSVHVYTEELPSPLEVLSEVSLT----SHGTSQREERKPAEEEE----- 345  
*S. nukiangensis Tsao* SQNNGNMWGRSVHVYTEELPSPLEVLSEVSLT----SHGTSQREERKPAEEEE----- 345  
*S. prenati* SQNNGNMWGRSVHVYTEELPSPLEVLSEVSLT----SHGTSQREERKPAEEEE----- 345  
*D. rerio* SQNSGSMWARSVQMYTEELPSPLEVLSEVSLT----P-----LDERKLVR----- 338  
*C. auratus* SHNNGSMWGRSVHVYTEELPSPLEVLSEVSLT----SHDTSHREEVKPAEED----- 345  
*C. carpio* SQNNSMWMGRSVQVYTEELPSPLEVLSEVSLT----SHGTSQREERKPAEED----- 342  
*C. semilaevis* GHTRGGLWVAADYLFSEERPSLEVISEFRLGPPLVSPPLPPKAPRGLTLGREE----N 352  
*E. lucius* GYSAGGLCLRPAYFYSEELPAPLEVLSEVSLDLP--SSPLPPKAKQAPGED----- 347  
. . . : .:.\* : \*\*:\* \*

*G. dobula* ERESQRSDSGLTDRWREPPQAHWLMEQLRALQENPESRPQSALLQSHDITYVTLNQ--GD 409  
*P. kaznakovi* ERESERSDGLTDRWREPPQAHWLMEQLRALQENPESRPQSLLQSHDITYVTLNQ--GD 402  
*S. gongshanensis* ERESERSDGLTDRWREPPQVHVLMEQLRHLQENPESRSQSSILQSHDITYVTLNQ--GD 402  
*S. nukiangensis Tsao* ERESERSDGLTDRWREPPQAHWLMEQLRHLQENPESRSQSSILQSHDITYVTLNQ--GD 402  
*S. prenati* ERESERSDGLTDRWREPPQAHWLMEQLRHLQENPESRSQSSILQSHDITYVTLNQ--GD 402  
*D. rerio* -DEDQRSDSGLTE-----PPHVLMEQLRALQENPESLRSRSTLLQSHDITYITLNH---SS 388  
*C. auratus* EKESERSDGLTDRWPDPPAHWLMDQLRALQENPESHQSSLLQSHDITYVTLNQ--GD 402  
*C. carpio* EKESERSDGLTDRWREPPQAHWLMEQLRALQENPQSLSQSLLVQSHDITYVTLNQNSQGD 402  
*C. semilaevis* QEVLERSASTVT-----HDPWLMDRV-----LHQTALLESQDPYVTLNS--PP 393  
*E. lucius* -EKLKRID-SLMERWRETPHEHWLMDQLRVLHQLPGP--QCSQLESQDAYVTLNAQN--HS 402  
:\* : \*\*\*\*\* : :.\* \*.\*

*G. dobula* IEQQVDDVFETLPLQTLFSTAGTSSLSTSHSDLGSLQSSGSGRLSSQSSFEYPNHTWP 469  
*P. kaznakovi* IEQQVDDVFETLPLQTLFSTAGTSSLSTSHSDLGSLQSSGSGRLSSQSSFEYPNHTWP 462  
*S. gongshanensis* NEQQVDDVFETLPLQTLFSTAGTSSLSTSHSDLGSLQSSGSGRLSSQSSFEYPNHTWP 462  
*S. nukiangensis Tsao* NEQQVDDVFETLPLQTLFSTAGTSSLSTSHSDLGSLQSSGSGRLSSQSSFEYPNHTWP 462  
*S. prenati* NEQQVDDVFETLPLQTLFSTAGTSSLSTSHSDLGSLQSSGSGRLSSQSSFEYPNHTWP 462  
*D. rerio* GGQREDDVFETLPLQTLFSTAGTSSLNASHSDLGSLRQSSASGRLSSQSSFEDPNHPWP 448  
*C. auratus* IEQQADDVFETLPLQTLFSTAGTSPSLISHSDLGSLQSSGSGRLSSQSSLEYPNHTWP 462  
*C. carpio* GEREVDDVFETLPLQTLFSTGTSSLSTSHSDLGSLQSSGSGRLSSQSSFEYPNQWTP 462  
*C. semilaevis* DGEQVDELLEESLPLEVLFHP--GVTALCESHSDLGSGQSSGS--RMSSQSSFEYPNQAWT 451  
*E. lucius* GEEPLDDILEETLPLQALFASGRT--CESHSDLGSLQSSGSGRLSTQSSFEYPNHTWP 460  
. \*::\*\*:\*.\* . \*\*\*\*\* \*\*.\* \*:\*:\*.\* \*:\* \*

*G. dobula* PKGPGYAYMAVADSGVSMYSPMSSSRIAEVGRHSMYTN DYKNEIV--WPLSGQYVKS 527  
*P. kaznakovi* PKGPGYAYMAVADSGVSMYSPMSSSRIAELGRHSMYTN DYKNEIV--WPLSGQYVKS 520  
*S. gongshanensis* PKGPGYAYMAVADSGVSMYSPMSSSKIAELGRHRMYTN DYKNEMFLHKWPLSGQYVKS 522  
*S. nukiangensis Tsao* PKGPGYAYMAVADSGVSMYSPMSSSKIAELGRHRMYTN DYKNEMFLHKWPLSGQYVKS 522  
*S. prenati* PKGPGYAYMAVADSGVSMYSPMSSSKITELGRHRMYTN DYKNEIFLHNWPLSGQYVKS 522  
*D. rerio* PKGPGYAYMAVADSGVSMYSPMSSSRITIEIGKRSFYANEYKNEIFGYKVPFSAQVQSG 508  
*C. auratus* PKGPGYAYMAVADSGVSMYSPMSSSRIAELGRHRIYTN DYKNEIFPHKWPLSGQYIKSG 522  
*C. carpio* PKGPGYTYMAVADSGVSMYSPMSSSRITELGRHRMYTN DYKNEIFLHKWPLFGEHNKSG 522  
*C. semilaevis* RKGPGYTYMAVADSGVSMYSPMS--RVEDVGRVPVYANDYKNDIMSQKTLFLQRQRAVD 509  
*E. lucius* PKGPGYTYMAVADSGVSMYSPMSSRIDYMGKGVITYNEyrNEIPAHROP IPFAF---- 516  
\*\*\*\*\*:\*\*\*\*\*:\*\*\*\*\* : :.\* .:\*:\*:\*:\* : :

*G. dobula* SESYTGAVW 536  
*P. kaznakovi* SESYTGAVW 529  
*S. gongshanensis* SESCTGPVW 531  
*S. nukiangensis Tsao* SESCTGPVW 531  
*S. prenati* SESCTGPVW 531  
*D. rerio* Y----- 509  
*C. auratus* ----- 522  
*C. carpio* SESCMGPVW 531  
*C. semilaevis* DND----- 512  
*E. lucius* ----- 516
