# Supplementary material for: Analysis of the erythropoietin of a Tibetan Plateau schizothoracine fish (Gymnocypris dobula) reveals enhanced cytoprotection function in hypoxic environments
Source: PubMed Central journal article supplement (PMC4714423; doi:10.1186/s12862-015-0581-0), 2016-01-15

**A**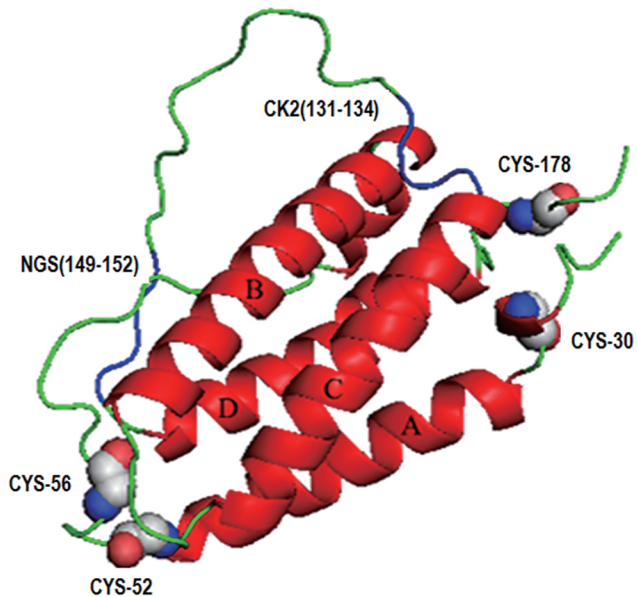**B**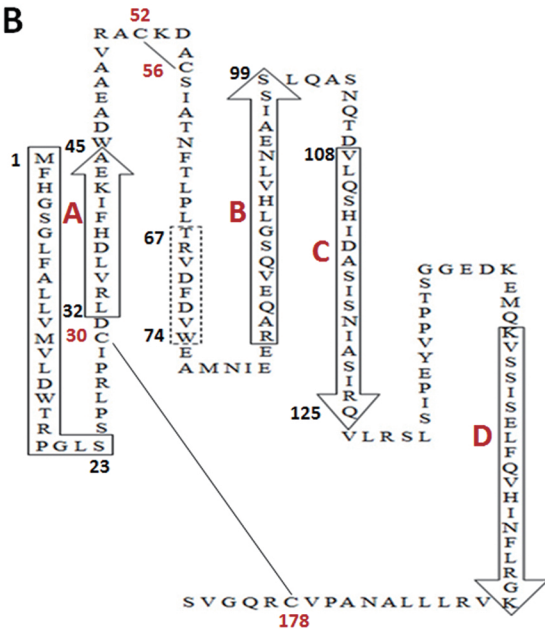

Supplement: 12862_2015_581_MOESM4_ESM.pdf [file 12862_2015_581_MOESM4_ESM.pdf]
