# Supplementary material for: Analysis of the erythropoietin of a Tibetan Plateau schizothoracine fish (Gymnocypris dobula) reveals enhanced cytoprotection function in hypoxic environments
Source: PubMed Central journal article supplement (PMC4714423; doi:10.1186/s12862-015-0581-0), 2016-01-15
Supplement: 12862_2015_581_MOESM7_ESM.pdf [file 12862_2015_581_MOESM7_ESM.pdf]

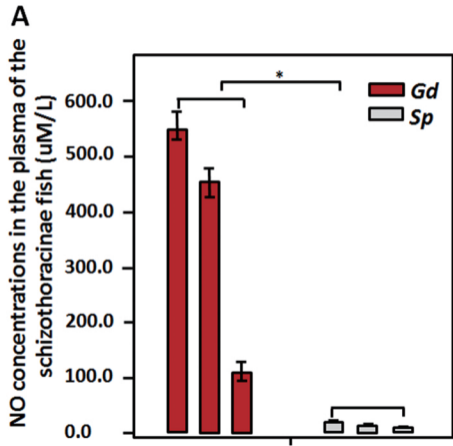

**B**

| Species Individual<br>(1,2,3) | Experiment Repeat |              |              | Average $\pm$ SD<br>uM/L | <i>Gd/Sp</i><br><i>P</i> value |
|-------------------------------|-------------------|--------------|--------------|--------------------------|--------------------------------|
|                               | Experiment 1      | Experiment 2 | Experiment 3 |                          |                                |
| <i>Gd1</i>                    | 534.83            | 539.68       | 585.82       | 553.44 $\pm$ 28.14       | * <i>P</i> <0.05               |
| <i>Gd2</i>                    | 466.57            | 426.84       | 474.83       | 456.08 $\pm$ 25.66       |                                |
| <i>Gd3</i>                    | 130.80            | 89.87        | 111.36       | 110.68 $\pm$ 20.47       |                                |
| <i>Sp1</i>                    | 20.20             | 18.63        | 21.60        | 20.14 $\pm$ 1.49         |                                |
| <i>Sp2</i>                    | 18.23             | 16.04        | 19.78        | 18.02 $\pm$ 1.88         |                                |
| <i>Sp3</i>                    | 9.30              | 5.13         | 11.21        | 8.55 $\pm$ 3.11          |                                |
